# Supplementary material
Source: PubMed Central journal article supplement (PMC7655457)
Supplement: 17-01239.pdf [file 17-01239.pdf]

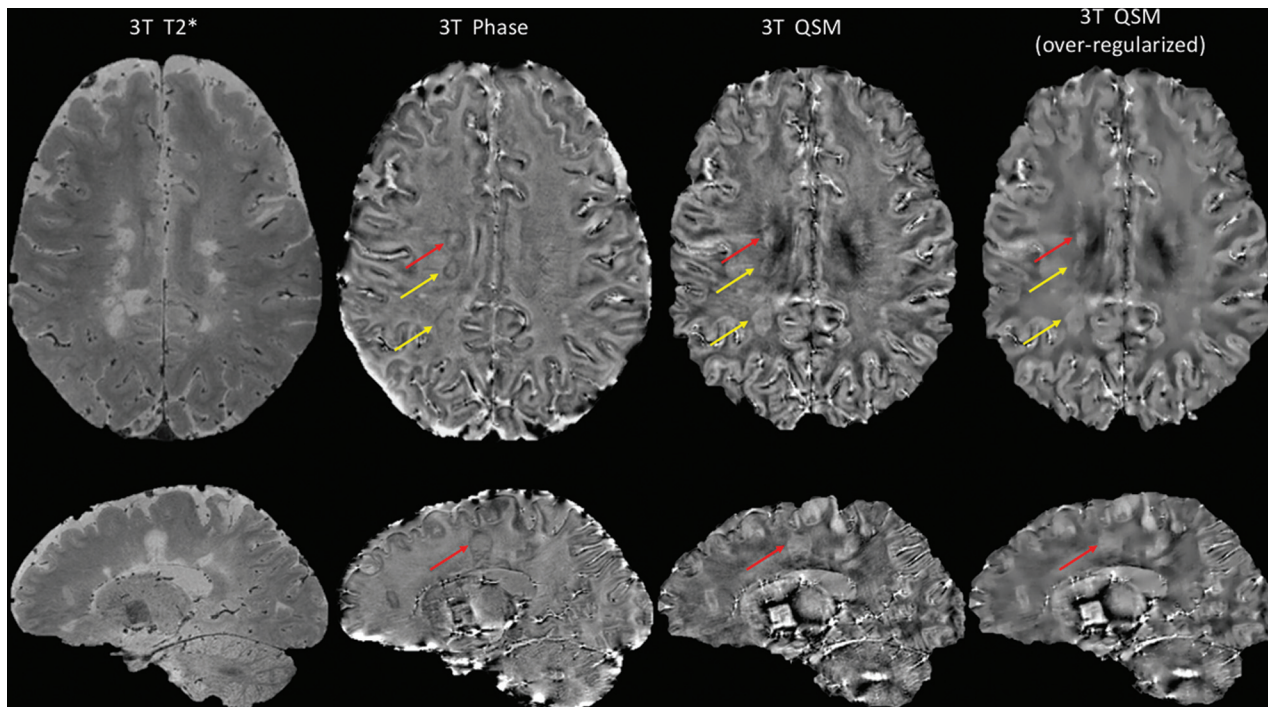

**ON-LINE FIGURE.** Comparison between phase and QSM images with different parameters for regularization at 3T MR imaging. MS lesions with paramagnetic rims (*yellow arrows*) are easier to detect on phase (hypointense) than on QSM (hyperintense) images. QSM images are typically smoothed; this process can result in a loss of conspicuity for rims. *Red arrows* indicate the same rim lesion on axial and sagittal reformations.
